# Supplementary material
Source: PubMed Central journal article supplement (PMC3624388)
Supplement: JVI.03301-12_zjv999097510so1.pdf [file JVI.03301-12_zjv999097510so1.pdf]

**Supplementary Table I. Antibodies and siRNA Sequences**

| <b>Protein</b> | <b>Antibody</b>                     | <b>siRNA</b>                                                                 |
|----------------|-------------------------------------|------------------------------------------------------------------------------|
| Daxx           | D7810; Sigma                        |                                                                              |
| pp65           | FITZ                                |                                                                              |
| NFκB p65       | SC-372; Santa Cruz                  |                                                                              |
| β-actin        | ab8226; Abcam                       |                                                                              |
| Tubulin        | DM 1A; Sigma                        |                                                                              |
| PA28α          | 38-2300; Invitrogen                 | 5'-GGAAGAAACAGCAGGAGAAUU-3'                                                  |
| PA28β          | SC-23642; Santa Cruz                | 5'-CAGAUAAAGCAGGAGAAGAAUU-3'                                                 |
| PA28γ          | PW 8190; ENZO                       | 5'-GAAUCAUAUGUCACUCUAUU-3'<br>(15)                                           |
| Hemagglutinin  | HA; Ha.11; Covance                  |                                                                              |
| PA200          | A kind gift from Martin Rechsteiner | #1: 5'-GAAAAGAGATGCAAAGTTA-3'<br>#2: 5'-GAATAGAGCCAGTTGCTAA-3'               |
| p53            | OP43; Calbiochem                    |                                                                              |
| Rpn1           | SC-68352; Santa Cruz                | R1.1:<br>5'-CCAAAGAGAAGGAGGAAGAUU-3'<br>R1.2:<br>5'-GACAAAGACAAGAAGGAAAUU-3' |
| 20S β-5        | PW8895; ENZO                        | 5'-CCAACAUGGUGUAUCAGUAUU-3'                                                  |
| Lamin A/C      | SC-7292; Santa Cruz                 |                                                                              |
| Cullin 1       | 71-8700; Zymed                      |                                                                              |
| Rpt2           | PW 8305; ENZO                       | 5'-AGAAGGAUGACAAGGACAAUU-3'                                                  |
| Rpn11          | S2324; Sigma                        | 5'-GGACAUGAACCAAGACAAAUU-3'                                                  |
| Rb             | 4H1; Cell Signaling                 |                                                                              |
| pp71           | 2H10-9 (9)                          |                                                                              |
| IE1            | 1B12 (22)                           |                                                                              |
| Ubiquitin      | MAB1510; Millipore                  | sc-29513; Santa Cruz                                                         |
| p21            | 2947S; Cell Signaling               |                                                                              |
| Scrambled      |                                     | D-001810-01-20; Dharmacon                                                    |
